# Supplementary material for: Intramolecular C-H···O Hydrogen Bonding in 1,4-Dihydropyridine Derivatives
Source: Molecules. 2011 Sep 19;16(9):8041–52. doi: 10.3390/molecules16098041 (PMC6264772; doi:10.3390/molecules16098041)
Supplement: Supplementary File 1 [file molecules-16-08041-s001.pdf]

## 1. Experimental data of synthesised 1,4-dihydropyridines

**2,6-Di(bromomethyl)-3,5-bis(ethoxycarbonyl)-4-methyl-1,4-dihydropyridine (1a).** Yield 1.25g, 59%, mp 92-94 °C. Anal. calcd. for C<sub>14</sub>H<sub>19</sub>Br<sub>2</sub>NO<sub>4</sub>: C, 39.55; H, 4.50; N, 3.29; found: C, 39.91; H, 4.37; N, 3.27.

**2,6-Di(bromomethyl)-3,5-bis(ethoxycarbonyl)-4-phenyl-N-methyl-1,4-dihydropyridine (1b).** Yield 2.19 g, 88 %, mp 124-126 °C. Anal. calcd. for C<sub>20</sub>H<sub>23</sub>Br<sub>2</sub>NO<sub>4</sub>: C, 47.92; H, 4.62; N, 2.79; found: 48.38; H, 4.61; N, 2.77.

**2,6-Di(bromomethyl)-3,5-bis(ethoxycarbonyl)-4-(2-trifluoromethylphenyl)-1,4-dihydropyridine (1c).** Yield 2.10 g , 76%, mp 111-112 °C. Anal. calcd. for C<sub>20</sub>H<sub>20</sub>Br<sub>2</sub>F<sub>3</sub>NO<sub>4</sub>: C, 43.27; H 3.63; N 2.52; found: C, 43.52; H, 3.40; N, 2.42.

**2,6-Di(bromomethyl)-3,5-bis(2-propoxyethoxycarbonyl)-4-(2-difluoromethoxyphenyl)-1,4-dihydropyridine (1d).** Yield 2.1 g, 61%, mp 102-105 °C. Anal. calcd. for C<sub>26</sub>H<sub>33</sub>Br<sub>2</sub>F<sub>2</sub>NO<sub>7</sub>: C, 46.65; H, 4.97; N, 2.09; found: 46.83; H, 4.91; N, 2.05.

**1,1'-[3,5-Bis(ethoxycarbonyl)-4-methyl-1,4-dihydropyridine-2,6-diyl]dimethylene}bispyridinium dibromide ( 2 a ).** Yield 0.73 g, 63%, mp 195-197 °C. MS(+ESI) *m/z* (relative intensity) 423 [(M-2Br)<sup>+</sup>, 20). Anal. calcd. for C<sub>24</sub>H<sub>29</sub>Br<sub>2</sub>N<sub>3</sub>O<sub>4</sub>: C, 49.42; H, 5.01; N, 7.20; found: C, 49.80; H, 4.83; N, 7.00.

**1,1'-[3,5-Bis(ethoxycarbonyl)-4-phenyl-N-methyl-1,4-dihydropyridine-2,6-diyl]dimethylene}bispyridinium dibromide ( 2 b ).** Yield 0.86 g, 66%, mp 196-200 °C. MS(+ESI) *m/z* (relative intensity) 499 [(M-2Br)<sup>+</sup>, 10). Anal. calcd. for C<sub>30</sub>H<sub>33</sub>Br<sub>2</sub>N<sub>3</sub>O<sub>4</sub>: C, 54.64; H, 5.04; N, 6.37; found: C, 54.92; H, 4.80; N, 6.08.

**1,1'-[3,5-Bis(ethoxycarbonyl)-4-(2-trifluoromethylphenyl)-1,4-dihydropyridine-2,6-diyl]dimethylene}bispyridinium dibromide ( 2 c).** Yield 1.32 g, 93%, mp 204-205 °C. MS(+ESI) *m/z* (relative intensity) 553 [(M-2Br)<sup>+</sup>, 15). Anal. calcd. for C<sub>30</sub>H<sub>30</sub>Br<sub>2</sub>F<sub>3</sub>N<sub>3</sub>O<sub>4</sub>: C, 50.51; H, 4.24; N, 5.89; found: C, 50.23; H, 4.15; N, 5.73.

**1,1'-[3,5-Bis(2-propoxyethoxycarbonyl)-4-(2-difluoromethoxyphenyl)-1,4-dihydropyridine-2,6-diyl]dimethylene}bispyridinium dibromide ( 2 d ).** Yield 1.23 g, 74%, mp 174 °C. MS(+ESI) *m/z*

(relative intensity) 669  $[(M-2Br)^+, 31]$ . Anal. calcd. for  $C_{36}H_{43}Br_2F_2N_3O_7$ : C, 52.25; H 5.23; N 5.08; found: C, 52.24; H, 5.17; N, 4.89.

**1,1'-{[3,5-Bis(methoxycarbonyl)-4-(2-difluoromethoxyphenyl)-N-methyl-2,6-diyl]dimethylene}bispyridinium dibromide ( 2 h).** Yield 1.15 g, 82%, mp 198-200 °C. MS(+ESI)  $m/z$  (relative intensity) 537  $[(M-2Br)^+, 25]$ . Anal. calcd. For  $C_{29}H_{29}Br_2F_2N_3O_5$ : C, 49.95; H, 4.19; N, 6.03; found: C, 50.15; H, 4.30; N, 5.86.

2. Table of  $^1H$  NMR spectral data.

Table of <sup>1</sup>H NMR spectral data

| Comp.     | Solvent           | Residual <sup>1</sup> H NMR signals of compounds <b>1-5</b>                                                                                                                                                                                                                                                                                                                                                                                                                                                                                                                                                                 |
|-----------|-------------------|-----------------------------------------------------------------------------------------------------------------------------------------------------------------------------------------------------------------------------------------------------------------------------------------------------------------------------------------------------------------------------------------------------------------------------------------------------------------------------------------------------------------------------------------------------------------------------------------------------------------------------|
| <b>1a</b> | CDCl <sub>3</sub> | 1.02(d, <i>J</i> =6.8Hz, 3H, CH <sub>3</sub> ) 1.32(t, <i>J</i> =7.2 Hz, 6H, 2CH <sub>3</sub> ), 3.89(kv, <i>J</i> =6.8 Hz, 1H, CH), 4.22-4.29(m, 4H, 2CH <sub>2</sub> )                                                                                                                                                                                                                                                                                                                                                                                                                                                    |
|           | DMSO              | 0.82(d, <i>J</i> =6.6Hz, 3H, CH <sub>3</sub> ), 1.22(t, <i>J</i> =7.1Hz, 6H, 2CH <sub>3</sub> ), 3.71(kv, <i>J</i> =6.6Hz, 1H, CH), 4.10-4.19(m, 4H, 2CH <sub>2</sub> )                                                                                                                                                                                                                                                                                                                                                                                                                                                     |
| <b>1b</b> | CDCl <sub>3</sub> | 1.31(t, <i>J</i> =7.3Hz, 6H, 2CH <sub>3</sub> ), 3.46(s, 3H, NCH <sub>3</sub> ), 4.24(kv, <i>J</i> =7.3Hz, 4H, 2CH <sub>2</sub> ), 5.23(s, 1H, CH), 7.16-7.23 (m, 5H, C <sub>6</sub> H <sub>5</sub> )                                                                                                                                                                                                                                                                                                                                                                                                                       |
|           | DMSO              | 1.21(t, <i>J</i> =7.2Hz, 6H, 2CH <sub>3</sub> ), 3.42(s, 3H, CH <sub>3</sub> ), 4.14(kv, <i>J</i> =7.2Hz, 4H, 2CH <sub>2</sub> ), 5.03(s, 1H, CH), 7.08-7.23 (m, 5H, C <sub>6</sub> H <sub>5</sub> )                                                                                                                                                                                                                                                                                                                                                                                                                        |
| <b>1c</b> | CDCl <sub>3</sub> | 1.20(t, <i>J</i> =7.1Hz, 6H, 2CH <sub>3</sub> ), 4.03-4.21(m, 4H, 2CH <sub>2</sub> ), 5.62 (kv, <i>J</i> =1Hz, 1H, CH), 7.29-7.51(m, 4H, C <sub>6</sub> H <sub>4</sub> )                                                                                                                                                                                                                                                                                                                                                                                                                                                    |
|           | DMSO              | 1.10(t, <i>J</i> =7.1Hz, 6H, 2CH <sub>3</sub> ), 3.94-4.06(m, 4H, 2CH <sub>2</sub> ), 5.44(kv, <i>J</i> =1 Hz, 1H, CH), 7.37-7.56(m, 4H, C <sub>6</sub> H <sub>4</sub> )                                                                                                                                                                                                                                                                                                                                                                                                                                                    |
| <b>1d</b> | CDCl <sub>3</sub> | 0.88(t, <i>J</i> =6.8Hz, 6H, 2CH <sub>3</sub> ), 1.55(m, 4H, 2CH <sub>2</sub> ), 3.35(t, <i>J</i> =6.8Hz, 4H, 2CH <sub>2</sub> ), 3.59 (m, 4H, 2CH <sub>2</sub> ), 4.20(t, <i>J</i> =4.9Hz, 4H, 2CH <sub>2</sub> ), 5.33(s, 1H, CH), 60(t, <i>J</i> =75Hz, 1H, CH)<br>7.01(d, <i>J</i> =8.4Hz, 1H, C <sub>6</sub> H <sub>4</sub> ), 7.08(td, <i>J</i> =7.4; <i>J</i> =0.9Hz, 1H, C <sub>6</sub> H <sub>4</sub> ), 7.17(td, <i>J</i> =7.6 Hz, <i>J</i> =0.9 Hz, C <sub>6</sub> H <sub>4</sub> ), 7.37(dd, <i>J</i> =7.8 Hz, <i>J</i> =1.6 Hz, 1H, C <sub>6</sub> H <sub>4</sub> )                                            |
|           | DMSO              | 0.81(t, <i>J</i> =7.5Hz, 6H, 2CH <sub>3</sub> ), 1.44(m, 4H, 2CH <sub>2</sub> ), 3.28(t, <i>J</i> =6.8Hz, 4H, 2CH <sub>2</sub> ), 3.52(t, <i>J</i> =4.7Hz, 4H, 2CH <sub>2</sub> ), 4.06-4.12(m, 4H, 2CH <sub>2</sub> ), 5.22(s, 1H, CH),<br>7.01(d, <i>J</i> =8.3Hz, 1H, C <sub>6</sub> H <sub>4</sub> ), 7.04(t, <i>J</i> =74Hz, 1H, C <sub>6</sub> H <sub>4</sub> ), 7.09(td, <i>J</i> =7.6 Hz, <i>J</i> =0.8 Hz, 1H, C <sub>6</sub> H <sub>4</sub> ), 7.20(td, <i>J</i> =7.6 Hz, <i>J</i> =0.9 Hz, 1H, C <sub>6</sub> H <sub>4</sub> ), 7.26(dd, <i>J</i> =7.6 Hz, <i>J</i> =1.2 Hz, 1H, C <sub>6</sub> H <sub>4</sub> ) |
| <b>1e</b> | CDCl <sub>3</sub> | 1.31(t, <i>J</i> =7.1Hz, 6H, 2CH <sub>3</sub> ), 3.64(s, 3H, CH <sub>3</sub> ), 4.20-4.30 (m, 4H, 2CH <sub>2</sub> ), 4.97(s, 1H, CH)                                                                                                                                                                                                                                                                                                                                                                                                                                                                                       |
|           | DMSO              | 1.21(t, <i>J</i> =7.1Hz, 6H, 2CH <sub>3</sub> ), 3.51(s, 3H, CH <sub>3</sub> ), 4.11-4.21(m, 4H, 2CH <sub>2</sub> ), 4.79(s, 1H, CH)                                                                                                                                                                                                                                                                                                                                                                                                                                                                                        |
| <b>1f</b> | CDCl <sub>3</sub> | 1.25(t, <i>J</i> =7Hz, 6H, 2CH <sub>3</sub> ), 4.14(m, 4H, 2CH <sub>2</sub> ), 5.02(s, 1H, CH), 7.17-7.27(m, 5H, C <sub>6</sub> H <sub>5</sub> )                                                                                                                                                                                                                                                                                                                                                                                                                                                                            |
|           | DMSO              | 1.15(t, <i>J</i> =7 Hz, 6H, 2CH <sub>3</sub> ), 4.05(m, 4H, 2CH <sub>2</sub> ), 4.89(s, 1H, CH), 7.12-7.24(m, 5H, C <sub>6</sub> H <sub>5</sub> )                                                                                                                                                                                                                                                                                                                                                                                                                                                                           |
| <b>1g</b> | CDCl <sub>3</sub> | 3.66(s, 6H, 2CH <sub>3</sub> ), 5.35(s, 1H, CH), 6.50 (t, <i>J</i> =75Hz, 1H, CH), 7.01(d, <i>J</i> =7.6 Hz, 1H, C <sub>6</sub> H <sub>4</sub> ), 7.10(t, <i>J</i> =7.6Hz, 1H, C <sub>6</sub> H <sub>4</sub> ), 7.19(t, <i>J</i> =7.6Hz, 1H, C <sub>6</sub> H <sub>4</sub> ), 7.33(d, <i>J</i> =7.6Hz, 1H, C <sub>6</sub> H <sub>4</sub> )                                                                                                                                                                                                                                                                                  |
|           | DMSO              | 3.55(s, 6H, 2CH <sub>3</sub> ), 5.26(s, 1H, CH), 7.02(d, <i>J</i> =7.8Hz, 1H, C <sub>6</sub> H <sub>4</sub> ), 7.10(td, <i>J</i> =7.5Hz, <i>J</i> =1.1Hz, 1H, C <sub>6</sub> H <sub>4</sub> ), 7.12(t, <i>J</i> =74.3Hz, 1H, CH), 7.21(td, <i>J</i> =7.5Hz, <i>J</i> =1.8Hz, 1H, C <sub>6</sub> H <sub>4</sub> ), 7.24(dd, <i>J</i> =7.5, <i>J</i> =1.8Hz, 1H, C <sub>6</sub> H <sub>4</sub> )                                                                                                                                                                                                                              |
| <b>1h</b> | CDCl <sub>3</sub> | 0.89(t, <i>J</i> =7Hz, 6H, 2CH <sub>3</sub> ), 1.27(m, 36H, 18CH <sub>2</sub> ), 1.61(t, <i>J</i> =7 Hz, 4H, 2CH <sub>2</sub> ), 4.07(m, 4H, 2CH <sub>2</sub> ), 5.02(s, 1H), 7.16-7.28(m, 5H, C <sub>6</sub> H <sub>5</sub> )                                                                                                                                                                                                                                                                                                                                                                                              |
|           | DMSO              | 0.83(t, <i>J</i> =7Hz, 6H, 2CH <sub>3</sub> ), 1.23(m, 36H, 18CH <sub>2</sub> ), 1.53(m, 4H, 2CH <sub>2</sub> ), 3.98(t, <i>J</i> =6.1Hz, 4H, 2CH <sub>2</sub> ), 4.91(s, 1H), 7.10-7.21(m, 5H, C <sub>6</sub> H <sub>5</sub> )                                                                                                                                                                                                                                                                                                                                                                                             |
| <b>1i</b> | CDCl <sub>3</sub> | 3.49(s, 3H, NCH <sub>3</sub> ), 3.75 (s, 6H, 2CH <sub>3</sub> ), 5.26(s, 1H, CH), 6.50(t, <i>J</i> =75.5 Hz, 1H, CHF <sub>2</sub> ), 7.01 (d, <i>J</i> =8.2Hz, 1H, C <sub>6</sub> H <sub>4</sub> ), 7.07(td, <i>J</i> =7.8Hz, <i>J</i> =1.1Hz, 1H, C <sub>6</sub> H <sub>4</sub> ), 7.11(dd, <i>J</i> =7.7Hz, <i>J</i> =1.8Hz, 1H, C <sub>6</sub> H <sub>4</sub> ), 7.19(td, <i>J</i> =7.7Hz, <i>J</i> =1.8Hz, 1H, C <sub>6</sub> H <sub>4</sub> )                                                                                                                                                                          |
|           | DMSO              | 3.41(s, 3H, NCH <sub>3</sub> ), 3.66 (s, 6H, 2CH <sub>3</sub> ), 5.35(s, 1H, CH), 7.0 (dd, <i>J</i> =7.8Hz; 1.3 Hz, 1H, C <sub>6</sub> H <sub>4</sub> ), 7.06 (td, <i>J</i> =7.8Hz, <i>J</i> =1.3Hz, 1H, C <sub>6</sub> H <sub>4</sub> ), 7.19(t, <i>J</i> =74 Hz, 1H, CHF <sub>2</sub> ), 7.23(m, 2H, C <sub>6</sub> H <sub>4</sub> )                                                                                                                                                                                                                                                                                      |
| <b>2a</b> | CDCl <sub>3</sub> | 1.16(d, <i>J</i> =6.5Hz, 3H, CH <sub>3</sub> ), 1.33(t, <i>J</i> =7.4Hz, 6H, 2CH <sub>3</sub> ), 3.96(kv, <i>J</i> =6.5Hz, 1H, CH), 4.21-4.30(m, 4H, 2CH <sub>2</sub> ), 8.20(t, <i>J</i> =7.4Hz, 4H, 2C <sub>6</sub> H <sub>4</sub> N), 8.69(t, <i>J</i> =7.4Hz, 2H, 2C <sub>6</sub> H <sub>4</sub> N), 9.31(dd, <i>J</i> =7.4Hz, <i>J</i> =1.2Hz, 4H, 2C <sub>6</sub> H <sub>4</sub> N).                                                                                                                                                                                                                                  |
|           | DMSO              | 1.03(d, <i>J</i> =6.5Hz, 3H, CH <sub>3</sub> ), 1.15(t, <i>J</i> =7.4Hz, 6H, 2CH <sub>3</sub> ), 3.86(kv, <i>J</i> =6.5Hz, 1H, CH), 4.09-4.19(m, 4H, 2CH <sub>2</sub> ), 8.06(t, <i>J</i> =7.4Hz, 4H, 2C <sub>6</sub> H <sub>4</sub> N), 8.55(t, <i>J</i> =7.5Hz, <i>J</i> =1.1Hz, 2H, 2C <sub>6</sub> H <sub>4</sub> N), 8.91(dd, <i>J</i> =7.5Hz, <i>J</i> =1.2Hz, 4H, 2C <sub>6</sub> H <sub>4</sub> N)                                                                                                                                                                                                                  |
| <b>2b</b> | CDCl <sub>3</sub> | 1.30(t, <i>J</i> =7.7Hz, 6H, 2CH <sub>3</sub> ), 3.55(s, 3H, CH <sub>3</sub> ), 4.22 (kv, <i>J</i> =7.7Hz, 4H, 2CH <sub>2</sub> ), 5.26(s, 1H, CH), 7.26-7.36 (m, 5H, C <sub>6</sub> H <sub>5</sub> ), 8.10(t, <i>J</i> =7.2Hz, 4H, 2C <sub>6</sub> H <sub>4</sub> N), 8.43(t, <i>J</i> =7.2Hz, 2H, 2C <sub>6</sub> H <sub>4</sub> N), 9.39(d, <i>J</i> =7.2Hz, 4H, 2C <sub>6</sub> H <sub>4</sub> N)                                                                                                                                                                                                                       |

|    |                   |                                                                                                                                                                                                                                                                                                                                                                                                                                                                                                                                                                                                                                                                                                                                |
|----|-------------------|--------------------------------------------------------------------------------------------------------------------------------------------------------------------------------------------------------------------------------------------------------------------------------------------------------------------------------------------------------------------------------------------------------------------------------------------------------------------------------------------------------------------------------------------------------------------------------------------------------------------------------------------------------------------------------------------------------------------------------|
|    | DMSO              | 1.17(t, $J=7.6$ Hz, 6H, 2CH <sub>3</sub> ), 3.28(s, 3H, CH <sub>3</sub> ), 4.17 (kv, $J=7.6$ Hz, 4H, 2CH <sub>2</sub> ), 5.13(s, 1H, CH), 7.26-7.34 (m, 5H, C <sub>6</sub> H <sub>5</sub> ), 8.02(t, $J=7.1$ Hz, 4H, 2C <sub>6</sub> H <sub>4</sub> N), 8.50(t, $J=7.2$ Hz, 2H, 2C <sub>6</sub> H <sub>4</sub> N ), 8.84(d, $J=7.2$ Hz, 4H, 2C <sub>6</sub> H <sub>4</sub> N)                                                                                                                                                                                                                                                                                                                                                  |
| 2c | CDCl <sub>3</sub> | 1,20(t, $J=7.2$ Hz, 6H, 2CH <sub>3</sub> ), 4.09-4.23 (m, 4H, 2CH <sub>2</sub> ), 5.79(kv, $J=2.1$ Hz, 1H, CH), 7.33(t, $J=7.8$ Hz, 1H, C <sub>6</sub> H <sub>4</sub> ), 7.54(d, $J=7.8$ Hz, 1H, C <sub>6</sub> H <sub>4</sub> ), 7.59(d, $J=7.8$ Hz, 1H, C <sub>6</sub> H <sub>4</sub> ), 7.69(t, $J=7.8$ Hz, 4H, C <sub>6</sub> H <sub>4</sub> ), 8.20(t, $J=7.1$ Hz, 4H, 2C <sub>6</sub> H <sub>4</sub> N), 8.55(t, $J=7.1$ Hz, 2H, 2C <sub>6</sub> H <sub>4</sub> N), 9.40(d, $J=7.1$ Hz, 4H, 2C <sub>6</sub> H <sub>4</sub> N)                                                                                                                                                                                            |
|    | DMSO              | 1,02(t, $J=7.2$ Hz, 6H, 2CH <sub>3</sub> ), 3.92-4.06 (m, 4H, 2CH <sub>2</sub> ), 5.58(kv, $J=2.1$ Hz, 1H, CH), 7.42(t, $J=7.6$ Hz, 1H, C <sub>6</sub> H <sub>4</sub> ), 7.57(d, $J=7.6$ Hz, 1H, C <sub>6</sub> H <sub>4</sub> ), 7.62(t, $J=7.6$ Hz, 1H, C <sub>6</sub> H <sub>4</sub> ), 7.70(d, $J=7.6$ Hz, H, C <sub>6</sub> H <sub>4</sub> ), 8.13(t, $J=7.4$ Hz, 4H, 2C <sub>6</sub> H <sub>4</sub> N), 8.59(t, $J=7.4$ , 2H, 2C <sub>6</sub> H <sub>4</sub> N ), 9.06(d, $J=7.4$ Hz, 4H, 2C <sub>6</sub> H <sub>4</sub> N)                                                                                                                                                                                              |
| 2d | CDCl <sub>3</sub> | 0.84(t, $J=7.8$ Hz, 6H, 2CH <sub>3</sub> ), 1.49(m, 4H, 2CH <sub>2</sub> ), 3.30(m, 4H, 2CH <sub>2</sub> ), 3.52(m, 4H, 2CH <sub>2</sub> ), 4.18(m, 4H, 2CH <sub>2</sub> ), 5.33(s, 1H, CH), 6.91(t, $J=64.7$ Hz, 1H, CHF <sub>2</sub> ), 7.03(t, $J=7.8$ Hz, 1H, C <sub>6</sub> H <sub>4</sub> ), 7.06(d, $J=7.8$ , $J=1.8$ Hz, 1H, C <sub>6</sub> H <sub>4</sub> ), 7.19(td, $J=7.8$ Hz, $J=1.8$ Hz, 1H, C <sub>6</sub> H <sub>4</sub> ), 7.36(dd, $J=7.8$ Hz, $J=1.8$ Hz, 1H, C <sub>6</sub> H <sub>4</sub> ), 8.19(t, $J=7.8$ Hz, 4H, 2C <sub>6</sub> H <sub>4</sub> N ), 8.67(td, $J=7.8$ Hz, $J=1.2$ Hz, 2H, 2C <sub>6</sub> H <sub>4</sub> N ), 9.44(dd, $J=7.8$ Hz, $J=1.1$ Hz, 4H, 2C <sub>6</sub> H <sub>4</sub> N). |
|    | DMSO              | 0.77(t, $J=7.8$ Hz, 6H, 2CH <sub>3</sub> ), 1.38(m, 4H, 2CH <sub>2</sub> ), 3.20(t, $J=6.8$ Hz, 4H, 2CH <sub>2</sub> ), 3.44(m, 4H, 2CH <sub>2</sub> ), 4.07(m, 4H, 2CH <sub>2</sub> ), 5.32(s, 1H, CH), 7.04(d, $J=7.6$ Hz, 1H, C <sub>6</sub> H <sub>4</sub> ), 7.11(t, $J=74.3$ Hz, 1H, CHF <sub>2</sub> ) 7.12(t, $J=7.3$ Hz, 1H, C <sub>6</sub> H <sub>4</sub> ), 7.28(t, $J=7.8$ Hz, 1H, C <sub>6</sub> H <sub>4</sub> ), 7.42(d, $J=7.8$ Hz, 1H, C <sub>6</sub> H <sub>4</sub> ), 8.11(t, $J=7.7$ Hz, 4H, 2C <sub>6</sub> H <sub>4</sub> N), 8.60(t, $J=7.7$ Hz, 2H, 2C <sub>6</sub> H <sub>4</sub> N), 9.03(d, $J=7.2$ Hz, 4H, 2C <sub>6</sub> H <sub>4</sub> N).                                                      |
| 2e | CDCl <sub>3</sub> | 1.29(t, $J=7.4$ Hz, 6H, 2CH <sub>3</sub> ), 3.69(s, 3H, CH <sub>3</sub> ), 4.19-4.30 (m., 4H, 2CH <sub>2</sub> ), 5.11 (s, 1H, CH), 8.17 (t, $J=7.1$ Hz, 4H, 2C <sub>6</sub> H <sub>4</sub> N), 8.60(t, $J=7.1$ Hz, 2H, 2C <sub>6</sub> H <sub>4</sub> N), 9.32(d, $J=7.6$ Hz, 4H, 2C <sub>6</sub> H <sub>4</sub> N)                                                                                                                                                                                                                                                                                                                                                                                                           |
|    | DMSO              | 1.13(t, $J=7.4$ Hz, 6H, 2CH <sub>3</sub> ), 3.58(s, 3H, CH <sub>3</sub> ), 4.09-4.19 (m., 4H, 2CH <sub>2</sub> ), 4.91 (s, 1H, CH), 8.12 (t, $J=7.2$ Hz, 4H, 2C <sub>6</sub> H <sub>4</sub> N), 8.60(t, $J=7.2$ Hz, 2H, 2C <sub>6</sub> H <sub>4</sub> N), 8.89(d, $J=7.6$ Hz, 4H, 2C <sub>6</sub> H <sub>4</sub> N)                                                                                                                                                                                                                                                                                                                                                                                                           |
| 2f | CDCl <sub>3</sub> | 1,23(t, $J=7.1$ Hz, 6H, 2CH <sub>3</sub> ), 4.09(m, 4H, 2CH <sub>2</sub> ), 5.10(s, 1H, CH), 7.21-7.28 (m, 5H, C <sub>6</sub> H <sub>5</sub> ), 8.19(t, $J=7.5$ Hz, 4H, 2C <sub>6</sub> H <sub>4</sub> N), 8.60(tt, $J=7.5$ Hz, $J=1$ Hz, 1Hz, 2H, 2C <sub>6</sub> H <sub>4</sub> N), 9.36(d, $J=7.5$ Hz, 4H, 2C <sub>6</sub> H <sub>4</sub> N),                                                                                                                                                                                                                                                                                                                                                                               |
|    | DMSO              | 1,18(t, $J=7.4$ Hz, 6H, 2CH <sub>3</sub> ), 4.04(m, 4H, 2CH <sub>2</sub> ), 5.01(s, 1H, CH), 7.18-7.28 (m, 5H, C <sub>6</sub> H <sub>5</sub> ), 8.10(t, $J=7.5$ Hz, 4H, 2C <sub>6</sub> H <sub>4</sub> N), 8.58(tt, $J=7.5$ , $J=1.2$ Hz, 2H, 2C <sub>6</sub> H <sub>4</sub> N), 8.99(dd, $J=7.5$ , $J=1.1$ Hz, 4H, 2C <sub>6</sub> H <sub>4</sub> N)                                                                                                                                                                                                                                                                                                                                                                          |
| 2g | CDCl <sub>3</sub> | 3.68(s, 6H, 2CH <sub>3</sub> ), 5.45(s, 1H, CH), 6.89(t, $J=74.1$ Hz, 1H, CHF <sub>2</sub> ), 7.08 (d, $J=7.6$ Hz, 1H, C <sub>6</sub> H <sub>4</sub> ), 7.14 (t, $J=7.6$ Hz, 1H, C <sub>6</sub> H <sub>4</sub> ), 7.24(t, $J=7.6$ Hz, 1H, C <sub>6</sub> H <sub>4</sub> ), 7.34(dd, $J=7.8$ Hz, $J=1.7$ Hz, 1H, C <sub>6</sub> H <sub>4</sub> ), 8.16(t, $J=7.4$ Hz, 4H, 2C <sub>6</sub> H <sub>4</sub> N), 8.56(t, $J=7.5$ Hz, 2H, 2C <sub>6</sub> H <sub>4</sub> N ), 8.16(d, $J=7.5$ Hz, 4H, 2C <sub>6</sub> H <sub>4</sub> N)                                                                                                                                                                                              |
|    | DMSO              | 3.31(s, 6H, 2CH <sub>3</sub> ), 5.36(s, 1H, CH), 7.03(d, $J=7.8$ , 1H, C <sub>6</sub> H <sub>4</sub> ), 7.15 (t, $J=7.8$ Hz, 1H, C <sub>6</sub> H <sub>4</sub> ), 7.16 (t, $J=74.2$ Hz, CHF <sub>2</sub> ), 7.27 (td, $J=7.6$ Hz, 1H, C <sub>6</sub> H <sub>4</sub> ), 7.41(dd, $J=7.6$ Hz, $J=1.2$ Hz, 1H, C <sub>6</sub> H <sub>4</sub> ), 8.11(t, $J=7.6$ Hz, 4H, 2C <sub>6</sub> H <sub>4</sub> N), 8.59(t, $J=7.6$ Hz, 2H, 2C <sub>6</sub> H <sub>4</sub> N ), 9.02(d, $J=7.6$ Hz, 4H, 2C <sub>6</sub> H <sub>4</sub> N)                                                                                                                                                                                                  |
| 2h | CDCl <sub>3</sub> | 3.53(s, 3H, NCH <sub>3</sub> ), 3.76(s, 6H, 2CH <sub>3</sub> ), 6.68(t, $J=74.2$ Hz, 1H, CHF <sub>2</sub> ), 5.53 (s, 1H), 7.09 (d, $J=7.8$ Hz, 1H, C <sub>6</sub> H <sub>4</sub> ), 7.26-7.33 (m, 3H, C <sub>6</sub> H <sub>4</sub> ), 8.11(t, $J=7.8$ Hz, 4H, 2C <sub>6</sub> H <sub>4</sub> N), 8.49(t, $J=7.8$ Hz, 2H, 2C <sub>6</sub> H <sub>4</sub> N ), 9.41 (d, $J=7.8$ Hz, 4H, 2C <sub>6</sub> H <sub>4</sub> N )                                                                                                                                                                                                                                                                                                     |
|    | DMSO              | 3.28(s, 3H, NCH <sub>3</sub> ), 3.76(s, 6H, 2CH <sub>3</sub> ), 5.49 (s, 1H, CH), 7.17 (t, $J=8.1$ Hz, 1H, C <sub>6</sub> H <sub>4</sub> ), 7.20(d, $J=8.1$ Hz, 1H, C <sub>6</sub> H <sub>4</sub> ), 7.27(d, $J=8.2$ Hz, 1H, C <sub>6</sub> H <sub>4</sub> ), 7.28(t, $J=73.6$ Hz, 1H, CHF <sub>2</sub> ), 7.34(t, $J=8.2$ Hz, 1H, C <sub>6</sub> H <sub>4</sub> ), 8.01(t, $J=7.5$ Hz, 4H, 2C <sub>6</sub> H <sub>4</sub> N ), 8.50(t, $J=7.6$ Hz, 2H, 2C <sub>6</sub> H <sub>4</sub> N), 8.81(d, $J=7.6$ Hz, 4H, 2C <sub>6</sub> H <sub>4</sub> N)                                                                                                                                                                           |
| 3a | CDCl <sub>3</sub> | 0.89(t, $J=6.5$ Hz, 6H, 2CH <sub>3</sub> ), 1.25(m, 28H, 14CH <sub>2</sub> ), 1.61(m, 4H, 2CH <sub>2</sub> ), 4.07(t, $J=6.5$ Hz, 4H, 2CH <sub>2</sub> ), 5.09(s, 1H, CH), 7.22-7.29(m, 5H, C <sub>6</sub> H <sub>5</sub> ), 8.19(t, $J=7.5$ Hz, 4H, 2C <sub>6</sub> H <sub>4</sub> N), 8.60(t, $J=7.5$ Hz 2H, 2C <sub>6</sub> H <sub>4</sub> N ), 9.34(d, $J=7.2$ , 4H, 2C <sub>6</sub> H <sub>4</sub> N )                                                                                                                                                                                                                                                                                                                    |
|    | DMSO              | 0.84(t, $J=6.9$ Hz, 6H, 2CH <sub>3</sub> ), 1.20(m, 28H, 14CH <sub>2</sub> ), 1.49(m, 4H, 2CH <sub>2</sub> ), 3.98(t, $J=6.5$ Hz, 4H, 2CH <sub>2</sub> ), 5.00(s, 1H, CH), 7.19-7.27(m, 5H, C <sub>6</sub> H <sub>5</sub> ), 8.08(t, $J=7.7$ Hz, 4H, 2C <sub>6</sub> H <sub>4</sub> N), 8.57(t, $J=7.7$ Hz, 2H, 2C <sub>6</sub> H <sub>4</sub> N), 8.94(d, $J=7.2$ Hz, 4H, 2C <sub>6</sub> H <sub>4</sub> N )                                                                                                                                                                                                                                                                                                                  |
| 3b | CDCl <sub>3</sub> | 0.88(t, $J=6.9$ Hz, 6H, 2CH <sub>3</sub> ), 1.26(m, 36H, 18CH <sub>2</sub> ), 1.60(m, 4H, 2CH <sub>2</sub> ), 4.07(t, $J=7.1$ Hz, 4H, 2CH <sub>2</sub> ), 5.08(s, 1H, CH), 7.20-7.29(m, 5H, C <sub>6</sub> H <sub>5</sub> ), 8.20(t, $J=7.3$ Hz, 4H, 2C <sub>6</sub> H <sub>4</sub> N), 8.61(t, $J=7.3$ Hz, 2H, 2C <sub>6</sub> H <sub>4</sub> N), 9.34(d, $J=7.3$ , 4H, 2C <sub>6</sub> H <sub>4</sub> N)                                                                                                                                                                                                                                                                                                                     |

|    |                   |                                                                                                                                                                                                                                                                                                                                                                                                                                              |
|----|-------------------|----------------------------------------------------------------------------------------------------------------------------------------------------------------------------------------------------------------------------------------------------------------------------------------------------------------------------------------------------------------------------------------------------------------------------------------------|
|    | DMSO              | 0.84(t, $J=6.9$ Hz, 6H, 2CH <sub>3</sub> ), 1.23(m, 36H, 18CH <sub>2</sub> ), 1.59(m, 4H, 2CH <sub>2</sub> ), 3.98(t, $J=7.1$ Hz, 4H, 2CH <sub>2</sub> ), 5.01(s, 1H, CH), 7.18-7.28(m, 5H, C <sub>6</sub> H <sub>5</sub> ), 8.07(t, $J=7.2$ Hz, 4H, 2C <sub>6</sub> H <sub>4</sub> N), 8.56(t, $J=7.2$ Hz, 2H, 2C <sub>6</sub> H <sub>4</sub> N), 8.92(d, $J=7.2$ , 4H, 2C <sub>6</sub> H <sub>4</sub> N)                                   |
| 3c | CDCl <sub>3</sub> | 0.82(t, $J=6.9$ Hz, 6H, 2CH <sub>3</sub> ), 1.22(m, 44H, 22CH <sub>2</sub> ), 1.54(m, 4H, 2CH <sub>2</sub> ), 4.01(t, $J=7.1$ Hz, 4H, 2CH <sub>2</sub> ), 5.02(s, 1H, CH), 7.14-7.23(m, 5H, C <sub>6</sub> H <sub>5</sub> ), 8.14(t, $J=7.6$ Hz, 4H, 2C <sub>6</sub> H <sub>4</sub> N), 8.57(t, $J=7.6$ Hz, 2H, 2C <sub>6</sub> H <sub>4</sub> N), 9.28(d, $J=7.6$ , 4H, 2C <sub>6</sub> H <sub>4</sub> N)                                   |
|    | DMSO              | 0.83(t, $J=6.9$ Hz, 6H, 2CH <sub>3</sub> ), 1.21(m, 44H, 22CH <sub>2</sub> ), 1.49(m, 4H, 2CH <sub>2</sub> ), 3.97(t, $J=6.9$ Hz, 4H, 2CH <sub>2</sub> ), 5.01(s, 1H, CH), 7.17-7.28(m, 5H, C <sub>6</sub> H <sub>5</sub> ), 8.08(t, $J=7.5$ Hz, 4H, 2C <sub>6</sub> H <sub>4</sub> N), 8.57(t, $J=7.5$ Hz, 2H, 2C <sub>6</sub> H <sub>4</sub> N), 8.95(d, $J=7.5$ Hz, 4H, 2C <sub>6</sub> H <sub>4</sub> N)                                 |
| 3d | CDCl <sub>3</sub> | 0.88(t, $J=7.2$ Hz, 6H, 2CH <sub>3</sub> ), 1.24(m, 52H, 26CH <sub>2</sub> ), 1.62(m, 4H, 2CH <sub>2</sub> ), 4.07(t, $J=6.8$ Hz, 4H, 2CH <sub>2</sub> ), 5.09(s, 1H, CH), 7.22-7.29(m, 5H, C <sub>6</sub> H <sub>5</sub> ), 8.19(t, $J=7.1$ Hz, 4H, 2C <sub>6</sub> H <sub>4</sub> N), 8.59(t, $J=7.1$ Hz, 2H, 2C <sub>6</sub> H <sub>4</sub> N), 9.34(d, $J=7.1$ Hz, 4H, 2C <sub>6</sub> H <sub>4</sub> N)                                 |
|    | DMSO              | 0.83(t, $J=7.2$ Hz, 6H, 2CH <sub>3</sub> ), 1.22(m, 52H, 26CH <sub>2</sub> ), 1.49(m, 4H, 2CH <sub>2</sub> ), 3.98(t, $J=6.1$ Hz, 4H, 2CH <sub>2</sub> ), 5.01(s, 1H, CH), 7.19-7.27(m, 5H, C <sub>6</sub> H <sub>5</sub> ), 8.07(t, $J=7.3$ Hz, 4H, 2C <sub>6</sub> H <sub>4</sub> N), 8.56(t, $J=7.3$ Hz, 2H, 2C <sub>6</sub> H <sub>4</sub> N), 8.56(d, $J=7.3$ Hz, 4H, 2C <sub>6</sub> H <sub>4</sub> N)                                 |
| 3e | CDCl <sub>3</sub> | 0.88(t, $J=7.1$ Hz, 6H, 2CH <sub>3</sub> ), 1.28(m, 36H, 18CH <sub>2</sub> ), 1.65(m, 4H, 2CH <sub>2</sub> ), 3.61(s, 3H, NCH <sub>3</sub> ), 4.14(t, $J=6.7$ Hz, 4H, 2CH <sub>2</sub> ), 5.25(s, 1H, CH), 7.25-7.36(m, 5H, C <sub>6</sub> H <sub>5</sub> ), 8.16(t, $J=7.5$ Hz, 4H, 2C <sub>6</sub> H <sub>4</sub> N), 8.49(t, $J=7.5$ Hz, 2H, 2C <sub>6</sub> H <sub>4</sub> N), 9.38(d, $J=7.5$ , 4H, 2C <sub>6</sub> H <sub>4</sub> N)   |
|    | DMSO              | 0.84(t, $J=7.1$ Hz, 6H, 2CH <sub>3</sub> ), 1.25(m, 36H, 18CH <sub>2</sub> ), 1.57(m, 4H, 2CH <sub>2</sub> ), 3.12(s, 3H, NCH <sub>3</sub> ), 4.10(t, $J=6.2$ Hz, 4H, 2CH <sub>2</sub> ), 5.15(s, 1H, CH), 7.18-7.31(m, 5H, C <sub>6</sub> H <sub>5</sub> ), 8.02(t, $J=7.2$ Hz, 4H, 2C <sub>6</sub> H <sub>4</sub> N), 8.50(t, $J=7.2$ Hz, 2H, 2C <sub>6</sub> H <sub>4</sub> N), 8.86(d, $J=7.2$ Hz, 4H, 2C <sub>6</sub> H <sub>4</sub> N) |
| 4a | CDCl <sub>3</sub> | 1.09(t, $J=7.3$ Hz, 3H, CH <sub>3</sub> ), 2.35(s, 3H, CH <sub>3</sub> ), 4.01(kv, $J=7.2$ Hz, 2H, CH <sub>2</sub> ), 4.87 (s, 1H, CH), 7.18-7.27(m, 5H, C <sub>6</sub> H <sub>5</sub> )                                                                                                                                                                                                                                                     |
|    | DMSO              | 1.01(t, $J=7.5$ Hz, 3H, CH <sub>3</sub> ), 2.35(s, 3H, CH <sub>3</sub> ), 3.90(m, 2H, CH <sub>2</sub> ), 4.68 (s, 1H, CH), 7.12-7.25(m, 5H, C <sub>6</sub> H <sub>5</sub> )                                                                                                                                                                                                                                                                  |
| 4f | CDCl <sub>3</sub> | 2.32(s, 3H, CH <sub>3</sub> ), 3.48(s, 3H, CH <sub>3</sub> ), 5.13(s, 1H, CH), 6.50 and 6.61(dd, $J=72$ Hz, $J=75$ Hz, 1H, CHF <sub>2</sub> ), 6.99(d, $J=7.8$ Hz, 1H, C <sub>6</sub> H <sub>4</sub> ), 7.07(td, $J=7.6$ Hz, $J=1.6$ , 1H, C <sub>6</sub> H <sub>4</sub> ), 7.13(td, $J=7.6$ Hz, $J=1.6$ Hz, 1H, C <sub>6</sub> H <sub>4</sub> ), 7.22(dd, $J=7.6$ Hz, $J=1.6$ Hz, 1H, C <sub>6</sub> H <sub>4</sub> )                       |
|    | DMSO              | 2.37(s, 3H, CH <sub>3</sub> ), 3.40(s, 3H, CH <sub>3</sub> ), 5.09(s, 1H, CH), 6.57( dd, $J=72$ Hz, $J=74$ Hz, 1H, CHF <sub>2</sub> ), 6.93(dt, $J=7.5$ Hz, $J=1.6$ Hz, 1H, C <sub>6</sub> H <sub>4</sub> ), 7.02(td, $J=7.5$ Hz, $J=1.6$ Hz, 1H, C <sub>6</sub> H <sub>4</sub> ), 7.05(td, $J=7.5$ Hz, $J=1.6$ Hz, 1H, C <sub>6</sub> H <sub>4</sub> ), 7.17(dd, $J=7.5$ Hz, $J=1.6$ Hz, 1H, C <sub>6</sub> H <sub>4</sub> )                |
| 5a | DMSO              | 4.67(s, 1H, CH), 7.08-7.21(m, 5H, C <sub>6</sub> H <sub>5</sub> ),                                                                                                                                                                                                                                                                                                                                                                           |
| 5f | DMSO              | 4.92(s, 1H, CH), 6.54(t, $J=75.2$ Hz, 1H), 6.93(d, $J=7.5$ Hz, 1H, C <sub>6</sub> H <sub>4</sub> ), 7.03(td, $J=7.5$ Hz, $J=1.9$ Hz, 1H, C <sub>6</sub> H <sub>4</sub> ), 7.08(td, $J=7.5$ Hz, $J=1.9$ Hz, 1H, C <sub>6</sub> H <sub>4</sub> ), 7.14(dd, $J=7.5$ Hz, $J=1.9$ Hz, 1H, C <sub>6</sub> H <sub>4</sub> )                                                                                                                         |
